# Supplementary material
Source: PubMed Central journal article supplement (PMC7160266)
Supplement: advancesADV2019001267-suppl1.pdf [file advancesADV2019001267-suppl1.pdf]

## Appendix A: Treatment Regimens.

### a. Intensive Induction:

| Regimen               |                             |
|-----------------------|-----------------------------|
| CIA                   | FLAG+MYLO                   |
| IA+ZARNESTRA          | CLIA                        |
| IA+Nivolumab          | 3(I)+7+AG-120               |
| IA                    | CLIA+Sorafenib              |
| BID FA                | IA+Sorafenib                |
| IA+IL11               | IA+PRAV                     |
| IDA+HDAC              | Plerixafor+3+7              |
| CLIA2                 | IA-IL11                     |
| CLIA+Mylo+Dexrazoxane | IA-BEVA                     |
| FLAG+Ida              | CLIA+Mylo+Dexra+Mido+Enasid |
| IA+BAY43-9006         | BID FA+Sorafenib            |
| FAI                   | FA+Sorafenib                |
| IA+SAHA               | CIA+Sorafenib               |
| AC220+3+7             | 3(I)+7+AG-221               |
| BID FA+Mylo           | CPX-351                     |
| MYLO+BID FA+CSA       | CIA+Dac                     |
| CLIA1                 | BID FA+Venetoclax           |
| FLAG                  |                             |
| IDA+HDAC(DI)          |                             |
| CLIA1+Sorafenib       |                             |
| FAI+Sorafenib         |                             |
| CLIA2+Sorafenib       |                             |
| CLIA2+Midostaurin     |                             |

**b. HMA+ Ven**

| <b>Regimen</b>                            |
|-------------------------------------------|
| <b>Venetoclax+ Decitabine (10d)</b>       |
| <b>Venetoclax+ Decitabine (5d)</b>        |
| <b>Venetoclax+ Azacitidine</b>            |
| <b>Venetoclax+ Decitabine+Midostaurin</b> |
| <b>Venetoclax+Decitabine+Sorafenib</b>    |

**c. HMA**

| <b>Regimen</b>               |
|------------------------------|
| <b>Decitabine 10 day</b>     |
| <b>Azacitidine</b>           |
| <b>Decitabine+Sorafenib</b>  |
| <b>Azacitidine+Sorafenib</b> |

**Appendix B****Cox Multivariate analysis for MRD negativity**

| <b>MRD negative status</b> | <b>Subgroup</b>                                | <b>Odds Ratio</b> | <b>95% Hazard Ratio Confidence Limits</b> | <b>p-value</b> | <b>FDR adjusted p-value</b> |
|----------------------------|------------------------------------------------|-------------------|-------------------------------------------|----------------|-----------------------------|
| <b>Treatment Group</b>     | <b>HMA vs. IC</b>                              | 0.11              | 0.02-0.76                                 | 0.018          | 0.036                       |
|                            | <b>HMA+VEN vs. IC</b>                          | 0.60              | 0.16-3.16                                 | 0.283          | 0.283                       |
| <b>ELN risk group</b>      | <b>Intermediate vs. favorable</b>              | 0.35              | 0.04-1.63                                 | 0.283          | -                           |
|                            | <b>Adverse vs. favorable</b>                   | 0.51              | 0.18-1.52                                 | 1.000          | -                           |
| <b>Age at diagnosis</b>    |                                                | 0.98              | 0.94-1.03                                 | 0.367          | -                           |
| <b>Secondary AML</b>       |                                                | 1.53              | 0.19-11.67                                | 0.701          | -                           |
| <b>Performance Status</b>  | <b>ECOG <math>\geq</math>2 vs. ECOG &lt; 2</b> | 1.69              | 0.46-5.58                                 | 0.460          | -                           |
| <b>FLT3-ITD</b>            | <b>Positive vs. Negative</b>                   | 0.62              | 0.25-1.53                                 | 0.297          | -                           |

Treatment outcomes *FLT3-ITD*<sup>+</sup> patients

| Treatment Group                                        | HMA+Ven<br>(N=4) | HMA<br>(N=28) | Intensive Induction<br>(N=100) |
|--------------------------------------------------------|------------------|---------------|--------------------------------|
| <i>FLT3</i> <sup>+</sup> / <i>FLT3i</i>                | 2                | 24            | 30                             |
| <i>FLT3</i> <sup>+</sup> /no <i>FLT3i</i>              | 2                | 4             | 70                             |
| <b>Response</b>                                        |                  |               |                                |
| CR composite (CR+CRi)                                  | 4 (100%)         | 10 (36%)      | 89 (89%)                       |
| Complete Response (CR)                                 | 4 (100%)         | 6 (21%)       | 84 (84%)                       |
| Complete Response with incomplete count recovery (CRi) | -                | 4 (14%)       | 5 (5%)                         |
| <b>Median Survival, years</b>                          |                  |               |                                |
| <i>FLT3</i> <sup>+</sup> / <i>FLT3i</i>                | NR               | 0.4 (0.3-0.5) | 4.7<br>(4.9 mo-9.0 years)      |
| <i>FLT3</i> <sup>+</sup> /no <i>FLT3i</i>              | 0.86             | 0.12 (0-0.6)  | 1.4 (0-2.8)                    |
